# Supplementary material for: Uncovering the missing piece of unsaturated two-dimensional phosphorus: a theoretical approach
Source: Royal Society of Chemistry journal article supplement (doi:10.1039/d1tc04337d), 2021-01-01
Supplement: d1tc04337d1.pdf [file d1tc04337d1.pdf]

## Supplemental information

Excavate the missing piece of unsaturated two-dimensional  
phosphorous: a theoretical approach

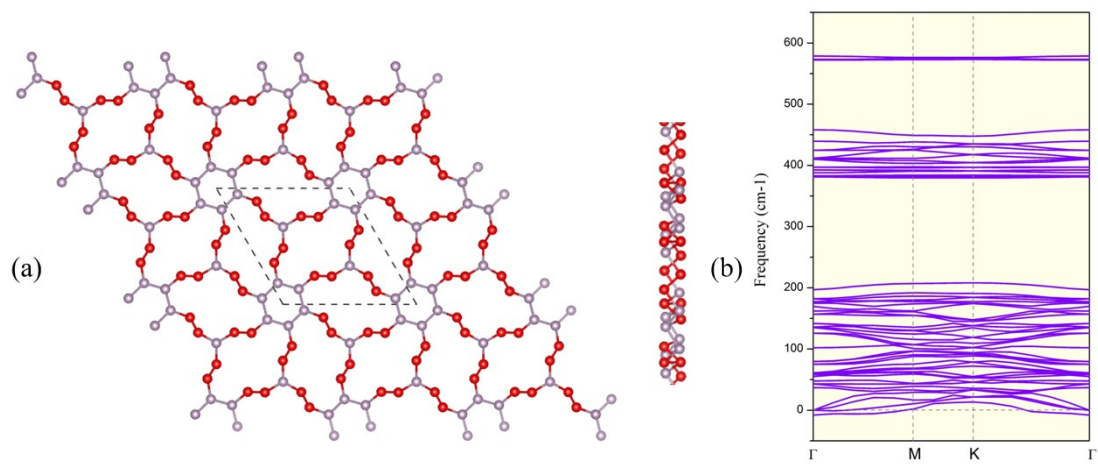

**Figure S1.** (a) optimized structure of  $\delta$ -PY and (b) its phonon dispersion. The existence of inescapable soft modes illustrates its unstable nature, dynamically.

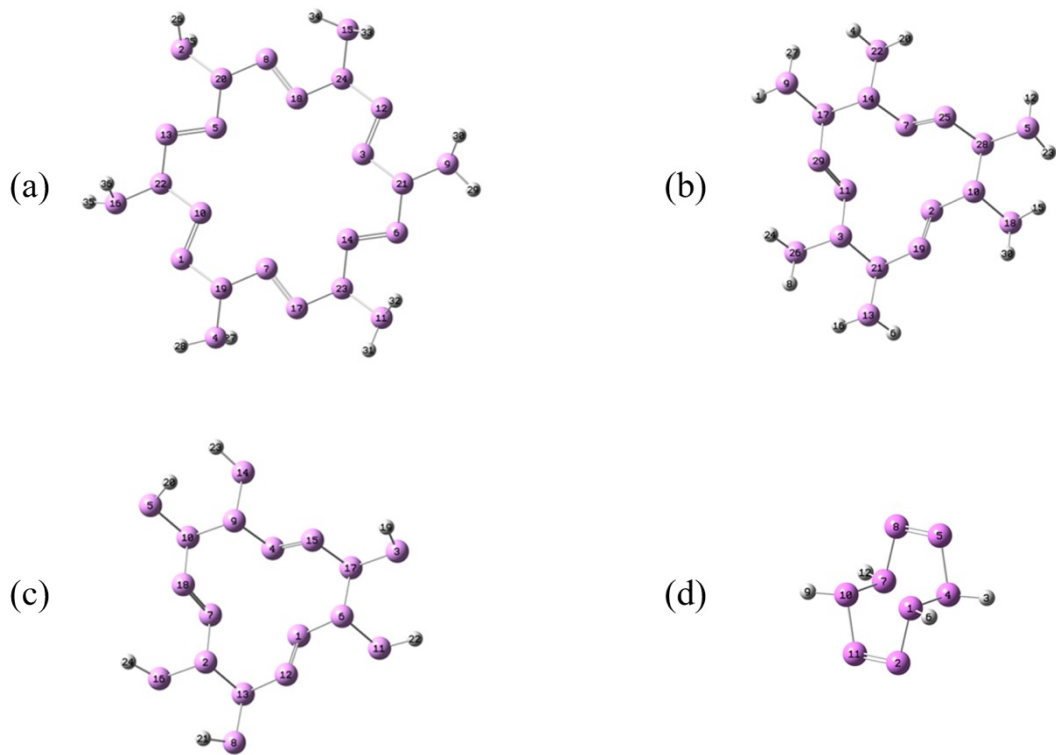

**Figure S2.** Smallest unit of (a)  $\alpha$ -, (b)  $\beta$ -, (c)  $\gamma$ - and (d)  $P_{68}$ -PY used in NBO analysis

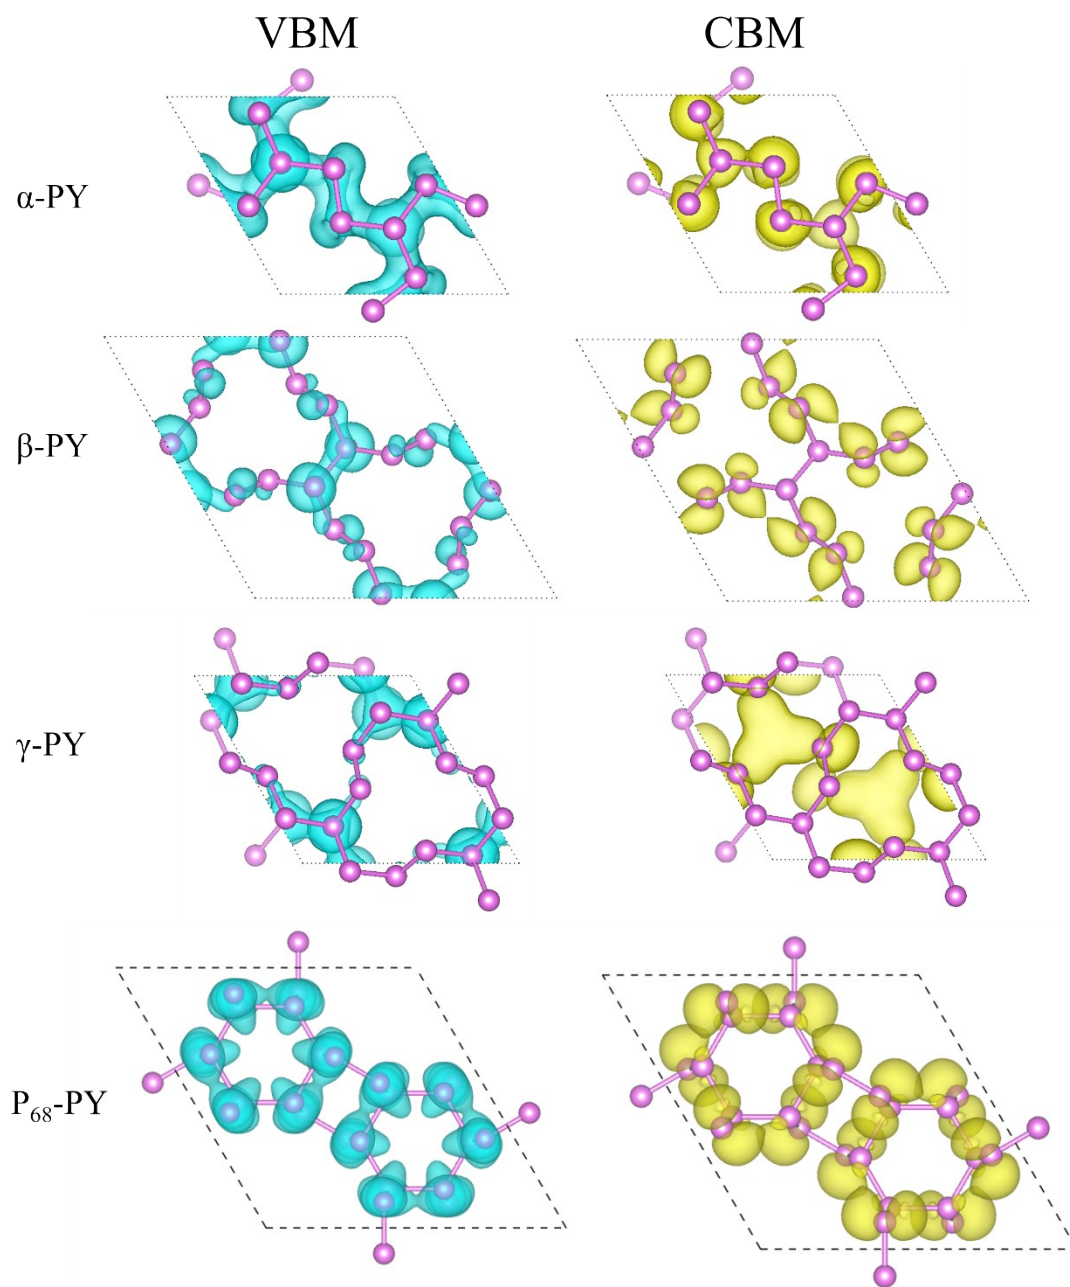

**Figure S3.** Density profile of the electron at valence band maximum and conduction band minimum for PY monolayers

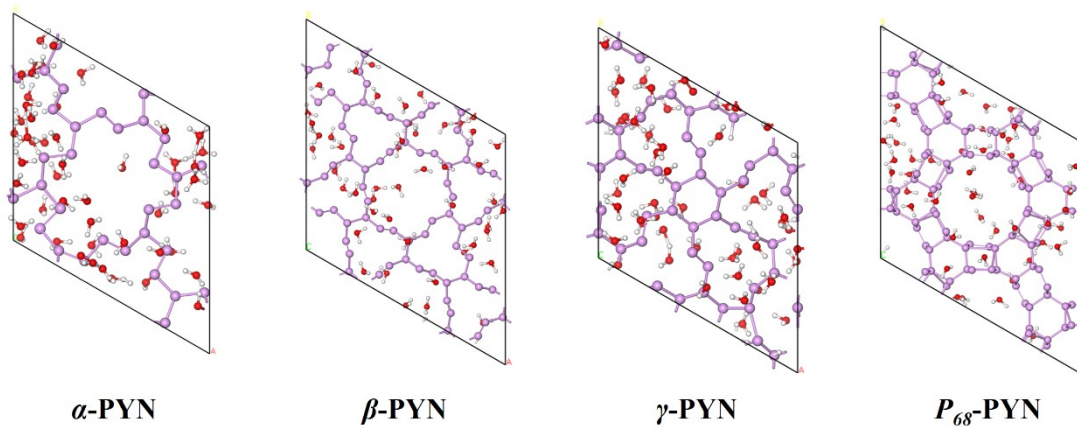

**Figure S4.** Snapshot of 5 ps AIMD simulations of PY in wet surroundings; water molecules are more favorable to approach  $sp^2$  phosphorous atoms, and some H atoms are dissociated from water molecules and bind to PY surface or even forming  $H_2$ .

**Table S1** Structural parameters of phosphoryne allotropes

|              | Angle (°)        |                  |                  |                  |
|--------------|------------------|------------------|------------------|------------------|
|              | $sp^2-sp^2-sp^3$ | $sp^2-sp^3-sp^2$ | $sp^2-sp^3-sp^3$ | $sp^3-sp^3-sp^3$ |
| $\alpha$ -PY | 99.26            | 104.71           | /                | /                |
| $\beta$ -PY  | 94.32            | 94.63            | 94.49            | /                |
| $\gamma$ -PY | 93.66            | /                | 89.90            | 94.45            |
| $P_{68}$ -PY | 103.12           | /                | 94.45/100.12     | 109.99           |

**Table S2** Second-Order Perturbation Theory Analysis of Fock Matrix in the NBO Basis corresponding to the intramolecular bonds of the unit of  $\beta$ -,  $\gamma$ - and  $P_{68}$ -PY at M062x/6-311G+(d, p) theoretical level

|              | donor(i)                              | acceptor (j)                         | E <sup>(2)</sup> Kcal/mol |
|--------------|---------------------------------------|--------------------------------------|---------------------------|
| $\beta$ -PY  | $\sigma(\text{P}_3\text{-P}_{26})$    | $\pi^*(\text{P}_{11}\text{-P}_{29})$ | 3.71                      |
|              | $\sigma(\text{P}_3\text{-P}_{21})$    | $\pi^*(\text{P}_2\text{-P}_{19})$    | 3.54                      |
|              | $\sigma(\text{P}_{10}\text{-P}_{18})$ | $\pi^*(\text{P}_2\text{-P}_{19})$    | 4.03                      |
|              | $\sigma(\text{P}_{10}\text{-P}_{28})$ | $\pi^*(\text{P}_7\text{-P}_{25})$    | 3.52                      |
|              | $\sigma(\text{P}_{14}\text{-P}_{17})$ | $\pi^*(\text{P}_{11}\text{-P}_{29})$ | 3.57                      |
|              | $\sigma(\text{P}_{14}\text{-P}_{22})$ | $\pi^*(\text{P}_7\text{-P}_{25})$    | 3.70                      |
| $\gamma$ -PY | $\sigma(\text{P}_2\text{-P}_{13})$    | $\pi^*(\text{P}_1\text{-P}_{12})$    | 3.36                      |
|              | $\sigma(\text{P}_2\text{-P}_{16})$    | $\pi^*(\text{P}_7\text{-P}_{18})$    | 3.82                      |
|              | $\sigma(\text{P}_6\text{-P}_{11})$    | $\pi^*(\text{P}_1\text{-P}_{12})$    | 3.24                      |
|              | $\sigma(\text{P}_6\text{-P}_{17})$    | $\pi^*(\text{P}_4\text{-P}_{15})$    | 3.49                      |
|              | $\sigma(\text{P}_9\text{-P}_{10})$    | $\pi^*(\text{P}_7\text{-P}_{18})$    | 3.42                      |
|              | $\sigma(\text{P}_9\text{-P}_{14})$    | $\pi^*(\text{P}_4\text{-P}_{15})$    | 2.87                      |
| $P_{68}$ -PY | $\sigma(\text{P}_1\text{-P}_4)$       | $\pi^*(\text{P}_2\text{-P}_{11})$    | 2.54                      |
|              | $\sigma(\text{P}_1\text{-P}_4)$       | $\pi^*(\text{P}_5\text{-P}_8)$       | 2.54                      |
|              | $\sigma(\text{P}_7\text{-P}_{10})$    | $\pi^*(\text{P}_2\text{-P}_{11})$    | 2.54                      |
|              | $\sigma(\text{P}_7\text{-P}_{10})$    | $\pi^*(\text{P}_5\text{-P}_8)$       | 2.54                      |

POSCAR of  $\alpha$ -PY

1PY

|                     |                    |                     |
|---------------------|--------------------|---------------------|
| 1.000000000000000   |                    |                     |
| 8.5156002045000001  | 0.0000000000000000 | 0.0000000000000000  |
| -4.2578001022000000 | 7.3747261054999997 | 0.0000000000000000  |
| 0.0000000000000000  | 0.0000000000000000 | 17.0466995238999992 |

P

8

Direct

|                    |                    |                    |
|--------------------|--------------------|--------------------|
| 0.4480800259999995 | 0.3641400200000007 | 0.9908799889999997 |
| 0.5519200430000026 | 0.635860060000015  | 0.0091199880000019 |
| 0.6358599280000021 | 0.0839400030000022 | 0.9908799889999997 |
| 0.3641400129999965 | 0.9160599909999974 | 0.0091199880000019 |
| 0.9160599630000021 | 0.5519200359999985 | 0.9908799889999997 |
| 0.0839400099999992 | 0.4480800230000028 | 0.0091199880000019 |
| 0.6666666759999984 | 0.3333333530000004 | 0.0429999999999993 |
| 0.3333333200000013 | 0.6666666409999991 | 0.9570000379999968 |



POSCAR of  $\beta$ -PY

2PY

|                     |                     |                     |
|---------------------|---------------------|---------------------|
| 1.000000000000000   |                     |                     |
| 11.8448657177374006 | -0.0000001601842046 | -0.0000000000000006 |
| -5.9224327200895379 | 10.2579546960665411 | 0.0000000000000002  |
| -0.0000000000000004 | -0.0000000000000007 | 24.5453769430127586 |

P

18

Direct

|                    |                    |                    |
|--------------------|--------------------|--------------------|
| 0.7289198818701266 | 0.5481343437515349 | 0.5300306911785526 |
| 0.2710800761298771 | 0.4518655732484618 | 0.4699692708214442 |
| 0.4518655792484623 | 0.1807855431185956 | 0.5300306911785455 |
| 0.5481343317515339 | 0.8192144468814035 | 0.4699692708214442 |
| 0.8192144798814098 | 0.2710800791298666 | 0.5300306911785526 |
| 0.1807855571185897 | 0.7289199108701325 | 0.4699692708214442 |
| 0.1298144457666268 | 0.3929831234498806 | 0.5289430131141586 |
| 0.8701855592333700 | 0.6070168665501186 | 0.4710569488858383 |
| 0.6070168625501182 | 0.7368312933167473 | 0.5289430131141586 |
| 0.3929831204498839 | 0.2631686726832569 | 0.4710569488858383 |
| 0.2631686796832540 | 0.8701855382333719 | 0.5289430131141586 |
| 0.7368313093167416 | 0.1298144387666227 | 0.4710569488858383 |
| 0.5897847122136355 | 0.5738607996109977 | 0.4769332743992862 |
| 0.4102152707863667 | 0.4261391653890030 | 0.5230667256007138 |
| 0.4261391903890015 | 0.0159238776026385 | 0.4769332743992862 |
| 0.5738608096109985 | 0.9840761213973650 | 0.5230667256007138 |
| 0.9840760313973647 | 0.4102152727863668 | 0.4769332743992862 |
| 0.0159238676026376 | 0.5897846932136375 | 0.5230667256007138 |

POSCAR of  $\gamma$ -PY

3PY

|                     |                    |                     |
|---------------------|--------------------|---------------------|
| 1.0000000000000000  |                    |                     |
| 8.6417581362278817  | 0.0000000630528554 | 0.0000000000000000  |
| -4.3208791227193153 | 7.4839820478088788 | 0.0000000000000000  |
| 0.0000000000000000  | 0.0000000000000000 | 21.4264348866011964 |

P

12

Direct

|                    |                    |                    |
|--------------------|--------------------|--------------------|
| 0.0420249493563531 | 0.2392527660574473 | 0.0281467971946938 |
| 0.9579751056436407 | 0.7607472149425476 | 0.9718531728053037 |
| 0.7607472699425486 | 0.8027721682989082 | 0.0281467971946938 |
| 0.2392527560574464 | 0.1972278577010940 | 0.9718531728053037 |
| 0.1972278457010930 | 0.9579751176436417 | 0.0281467971946938 |
| 0.8027721072989067 | 0.0420249463563565 | 0.9718531728053037 |
| 0.5359889135362366 | 0.6037096993834297 | 0.9689993870638460 |
| 0.4640111074637687 | 0.3962903416165702 | 0.0310006609361579 |
| 0.3962903386165735 | 0.9322792831527948 | 0.9689993870638460 |
| 0.6037096963834330 | 0.0677207358472032 | 0.0310006609361579 |
| 0.0677207208472055 | 0.4640110704637692 | 0.9689993870638460 |
| 0.9322792581527963 | 0.5359889405362352 | 0.0310006609361579 |

POSCAR of  $P_{68}$ -PY

4PY

|                      |                     |                     |
|----------------------|---------------------|---------------------|
| 1.000000000000000    |                     |                     |
| 12.0612790545750475  | -0.0000000136799655 | -0.0000000000000002 |
| -6.0306395154145083  | 10.4453740701894056 | 0.0000000000000002  |
| -0.00000000000000013 | 0.0000000000000000  | 30.3466732144643103 |

P

24

Direct

|                    |                    |                    |
|--------------------|--------------------|--------------------|
| 0.4821721763218463 | 0.3323719812229982 | 0.0008853167870484 |
| 0.5178278476781557 | 0.6676280027770005 | 0.9991147172129544 |
| 0.6676280397770071 | 0.1498001650988670 | 0.0008853167870484 |
| 0.3323719652229897 | 0.8501997809011357 | 0.9991147172129544 |
| 0.8501998069011449 | 0.5178278376781336 | 0.0008853167870484 |
| 0.1498001520988552 | 0.4821721453218615 | 0.9991147172129544 |
| 0.9012994880273126 | 0.5577917159673120 | 0.9301272773173466 |
| 0.0987005359726894 | 0.4422082670326830 | 0.0698726966826513 |
| 0.4422082410326809 | 0.3435077160600102 | 0.9301272773173466 |
| 0.5577916839673165 | 0.6564922299399925 | 0.0698726966826513 |
| 0.6564922969400087 | 0.0987005239726741 | 0.9301272773173466 |
| 0.3435077310599937 | 0.9012994690273288 | 0.0698726966826513 |
| 0.8500266994207379 | 0.3322302865493114 | 0.9992710999610139 |
| 0.1499732895792647 | 0.6677696594506912 | 0.0007289340389889 |
| 0.6677696754506854 | 0.5177964018714007 | 0.9992710999610139 |
| 0.3322303005493197 | 0.4822035811285943 | 0.0007289340389889 |
| 0.4822035841285839 | 0.1499732945792829 | 0.9992710999610139 |
| 0.5177964068714189 | 0.8500266884207122 | 0.0007289340389889 |
| 0.9015605493449002 | 0.3437575464078577 | 0.0699927931147784 |
| 0.0984394236550941 | 0.6562423995921449 | 0.9300072228852230 |
| 0.6562424295921332 | 0.5578029819370514 | 0.0699927931147784 |
| 0.3437575614078625 | 0.4421970010629508 | 0.9300072228852230 |
| 0.4421970080629620 | 0.0984394446550922 | 0.0699927931147784 |
| 0.5578029789370405 | 0.9015605293449127 | 0.9300072228852230 |
